# Supplementary material for: Improvement of Thermal Stability and Photoelectric Performance of Cs2PbI2Cl2/CsPbI2.5Br0.5 Perovskite Solar Cells by Triple-Layer Inorganic Hole Transport Materials
Source: MDPI journal article supplement (doi:10.3390/nano14090742), 2024-04-24
Supplement: s1 [file s1]

## Supporting Information

# Improvement of Thermal Stability and Photoelectric Performance of $\text{Cs}_2\text{PbI}_2\text{Cl}_2/\text{CsPbI}_{2.5}\text{Br}_{0.5}$ Perovskite Solar Cells by Triple-Layer Inorganic Hole Transport Materials

Yu Liu, Bicui Li, Jia Xu and Jianxi Yao \*

State Key Laboratory of Alternate Electrical Power System with Renewable Energy Sources, Beijing Key Laboratory of Energy Safety and Clean Utilization, North China Electric Power University, Beijing 102206, China

\* Correspondence: jianxiyao@ncepu.edu.cn

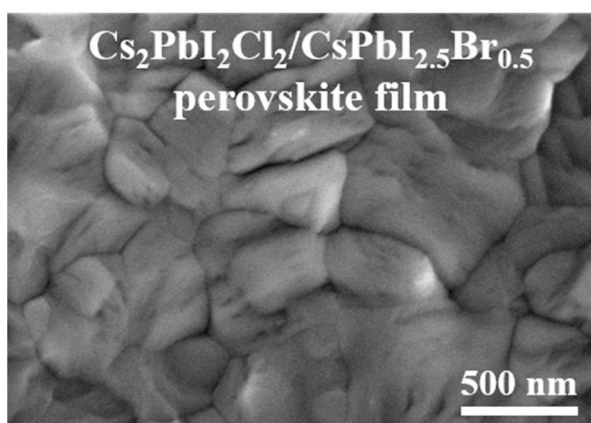

**Figure S1.** Top-view SEM image of the  $\text{Cs}_2\text{PbI}_2\text{Cl}_2/\text{CsPbI}_{2.5}\text{Br}_{0.5}$  perovskite film.

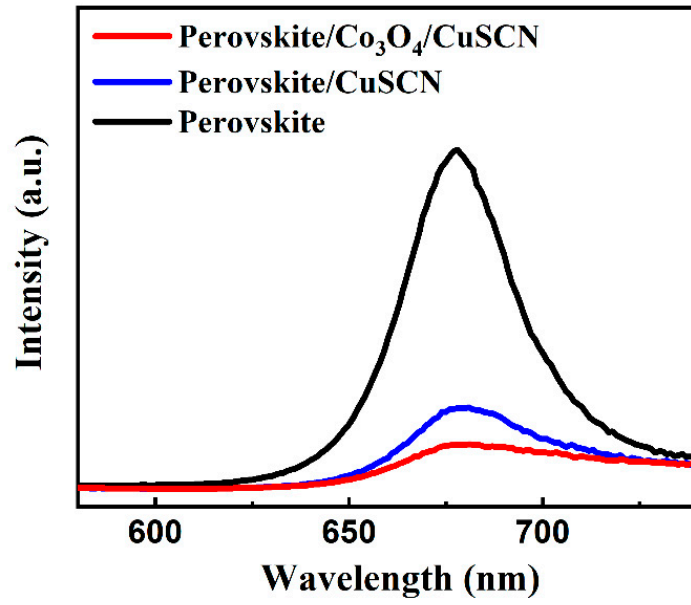

**Figure S2.** PL spectra of perovskite film, perovskite/CuSCN film and perovskite/Co<sub>3</sub>O<sub>4</sub>/CuSCN film

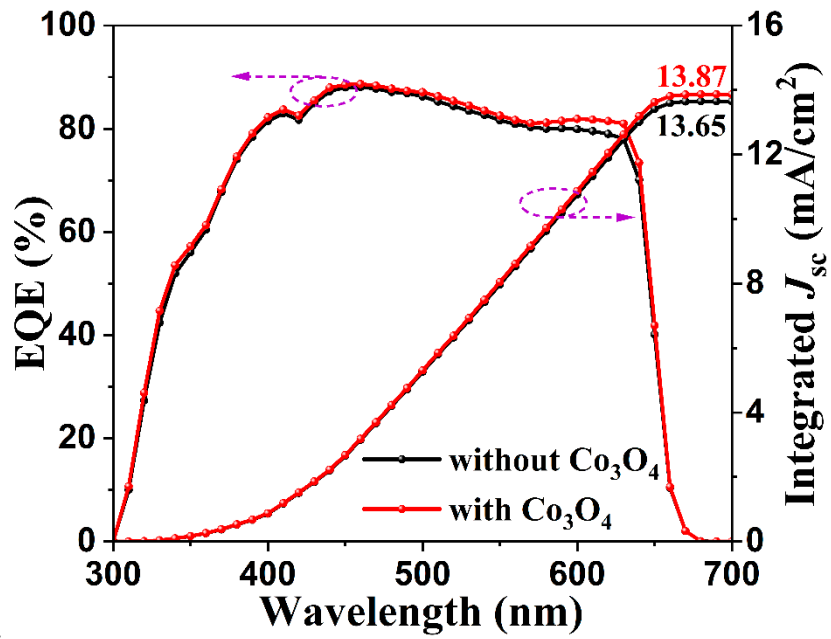

**Figure S3.** The EQE and integrated  $J_{sc}$  curves of Cs<sub>2</sub>PbI<sub>2</sub>Cl<sub>2</sub>/CsPbI<sub>2.5</sub>Br<sub>0.5</sub> perovskite solar cells without Co<sub>3</sub>O<sub>4</sub> buffer layer and with 1 mg/mL Co<sub>3</sub>O<sub>4</sub> buffer layer.

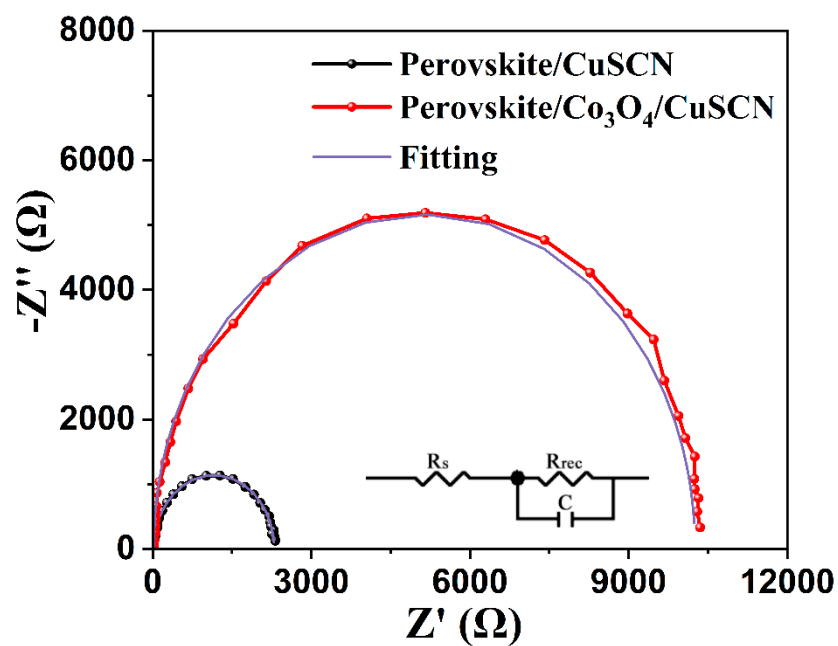

**Figure S4.** Nyquist diagrams for  $\text{Cs}_2\text{PbI}_2\text{Cl}_2/\text{CsPbI}_{2.5}\text{Br}_{0.5}$  perovskite solar cells without  $\text{Co}_3\text{O}_4$  buffer layer and with 1 mg/mL  $\text{Co}_3\text{O}_4$  buffer layer; the inset depicts the equivalent circuit model of the devices in the EIS.

**Table S1.** Photoelectric performance parameters of Cs<sub>2</sub>PbI<sub>2</sub>Cl<sub>2</sub>/CsPbI<sub>2.5</sub>Br<sub>0.5</sub> perovskite solar cells with different concentrations of Co<sub>3</sub>O<sub>4</sub> between perovskite/CuSCN layers.

| Device                                                | $J_{sc}$ (mA cm <sup>-2</sup> ) | $V_{oc}$ (V) | $FF$ (%) | PCE (%) |
|-------------------------------------------------------|---------------------------------|--------------|----------|---------|
| Perovskite/CuSCN                                      | 13.93                           | 1.07         | 66.28    | 9.87    |
| Perovskite/0.50-Co <sub>3</sub> O <sub>4</sub> /CuSCN | 14.06                           | 1.09         | 66.14    | 10.12   |
| Perovskite/0.75-Co <sub>3</sub> O <sub>4</sub> /CuSCN | 14.00                           | 1.10         | 68.41    | 10.55   |
| Perovskite/1.00-Co <sub>3</sub> O <sub>4</sub> /CuSCN | 14.05                           | 1.11         | 71.26    | 11.13   |
| Perovskite/1.50-Co <sub>3</sub> O <sub>4</sub> /CuSCN | 13.64                           | 1.07         | 64.07    | 9.34    |
| Perovskite/2.00-Co <sub>3</sub> O <sub>4</sub> /CuSCN | 13.67                           | 1.02         | 62.12    | 8.64    |

**Table S2.** Carrier lifetimes of perovskite, perovskite/CuSCN, and perovskite/Co<sub>3</sub>O<sub>4</sub>/CuSCN films obtained from curve-fitting TRPL spectra using a double exponential function.

| Sample                                           | A <sub>1</sub> | $\tau_1$ (ns) | A <sub>2</sub> | $\tau_2$ (ns) | $\tau_{ave}$ (ns) |
|--------------------------------------------------|----------------|---------------|----------------|---------------|-------------------|
| Perovskite                                       | 0.46           | 1.64          | 0.53           | 15.70         | 9.08              |
| Perovskite/CuSCN                                 | 0.99           | 1.87          | 0.18           | 13.45         | 4.27              |
| Perovskite/Co <sub>3</sub> O <sub>4</sub> /CuSCN | 0.57           | 1.15          | 0.41           | 5.71          | 3.00              |

**Table S3.** Performance parameters of the fitted EIS maps for Cs<sub>2</sub>PbI<sub>2</sub>Cl<sub>2</sub>/CsPbI<sub>2.5</sub>Br<sub>0.5</sub> perovskite solar cells without Co<sub>3</sub>O<sub>4</sub> buffer layer and with 1 mg/mL Co<sub>3</sub>O<sub>4</sub> buffer layer.

| Device                                           | $R_s$ ( $\Omega$ ) | $R_{rec}$ ( $\Omega$ ) | $C$ (F)               |
|--------------------------------------------------|--------------------|------------------------|-----------------------|
| Perovskite/CuSCN                                 | 18.05              | 2315                   | 4.86×10 <sup>-9</sup> |
| Perovskite/Co <sub>3</sub> O <sub>4</sub> /CuSCN | 17.72              | 10184                  | 4.21×10 <sup>-9</sup> |
